# Supplementary material for: Nitrogen-rich covalent organic frameworks with multiple carbonyls for high-performance sodium batteries
Source: PubMed Central journal article supplement (PMC6954217; doi:10.1038/s41467-019-13739-5), 2020-01-10
Supplement: 41467_2019_13739_MOESM1_ESM.pdf [file 41467_2019_13739_MOESM1_ESM.pdf]

## **Supplementary Information**

# **Nitrogen-Rich Covalent Organic Frameworks with Multiple Carbonyls for High-Performance Sodium Batteries**

Shi et al.

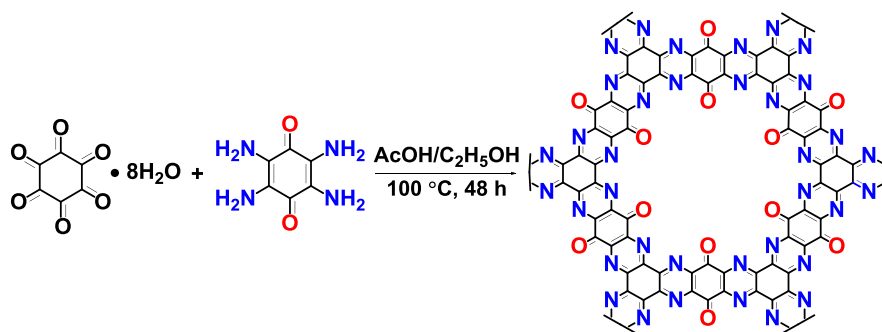

**Supplementary Figure 1. Synthesis route and the chemical structure of TQBQ-COF.**

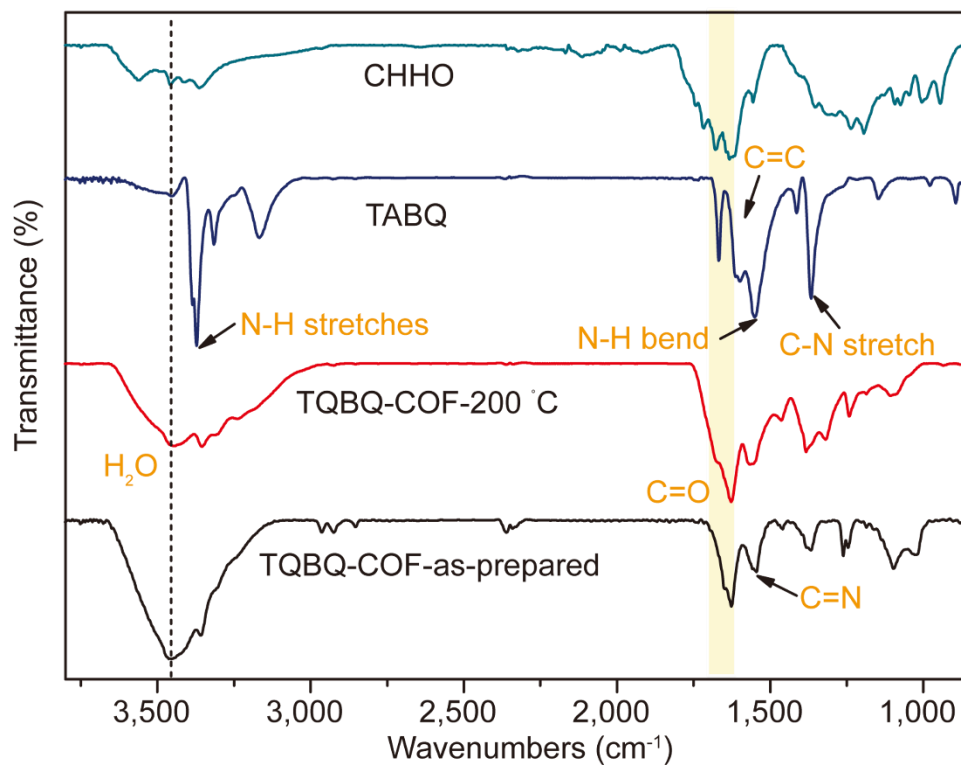

**Supplementary Figure 2. FTIR spectra of CHHO, TABQ, TQBQ-COF-200 °C, and TQBQ-COF-as-prepared.** The characteristic peaks corresponding to different functional groups are marked above. The peak at  $3,373\text{ cm}^{-1}$  can be assigned to the amino groups of TABQ and the peaks ranging from  $4,000$  to  $3,500\text{ cm}^{-1}$  for TQBQ-COF can be assigned to the edge groups ( $\text{NH}_2/\text{OH}$ ) and adsorbed substances (such as  $\text{H}_2\text{O}$ ,  $\text{CH}_3\text{OH}$ ,  $\text{CO}_2$ ) inside the holes. Besides, the strong peak at  $1,550\text{ cm}^{-1}$  of TABQ is mostly corresponding to the vibration mode of N-H bend, and the peak at  $\sim 1,600\text{ cm}^{-1}$  could be assigned to the vibration mode of C=C.

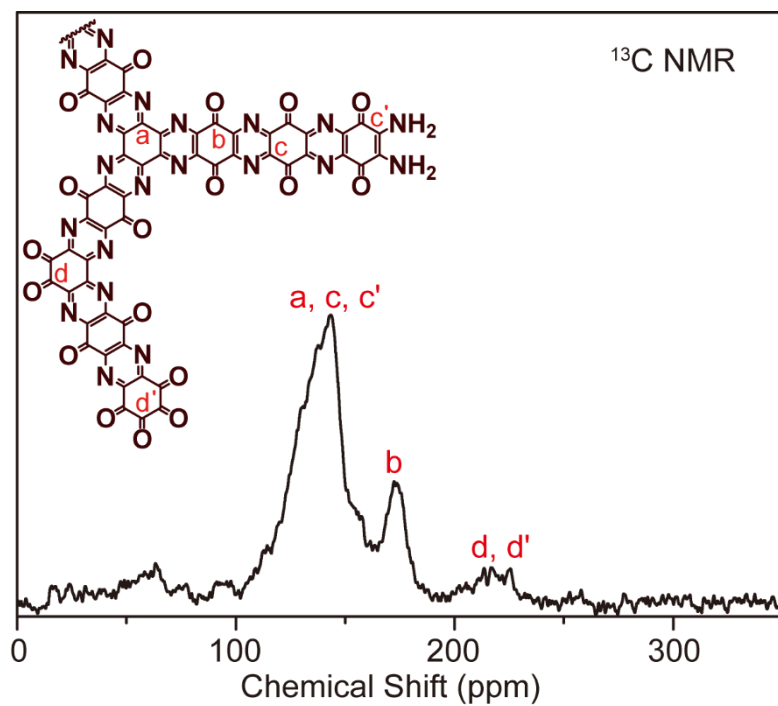

**Supplementary Figure 3. Solid-state  $^{13}\text{C}$  NMR spectrum of TQBQ-COF (inset: the possible functional groups in the edge of TQBQ-COF).**

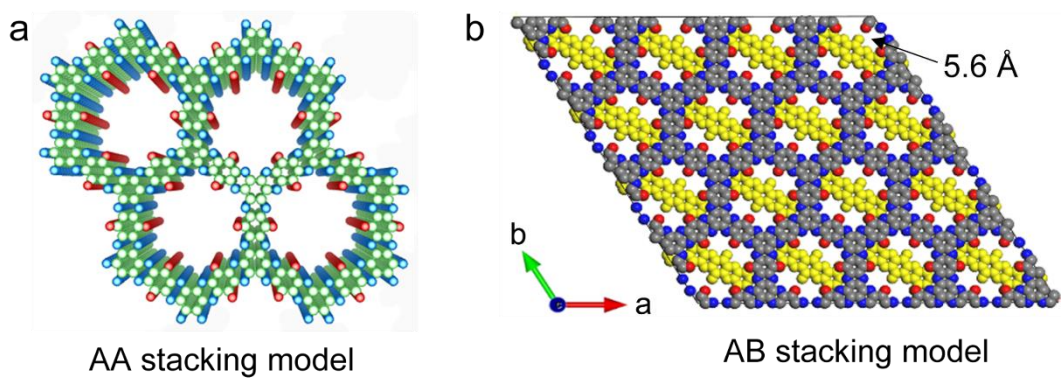

**Supplementary Figure 4. Simulated AA/AB stacking models of TQBQ-COF layers.**

(a) The simulated AA stacking model of TQBQ-COF layers. (b) The simulated AB stacking model of TQBQ-COF layers, with a pore size of  $\sim 5.6 \text{ \AA}$ .

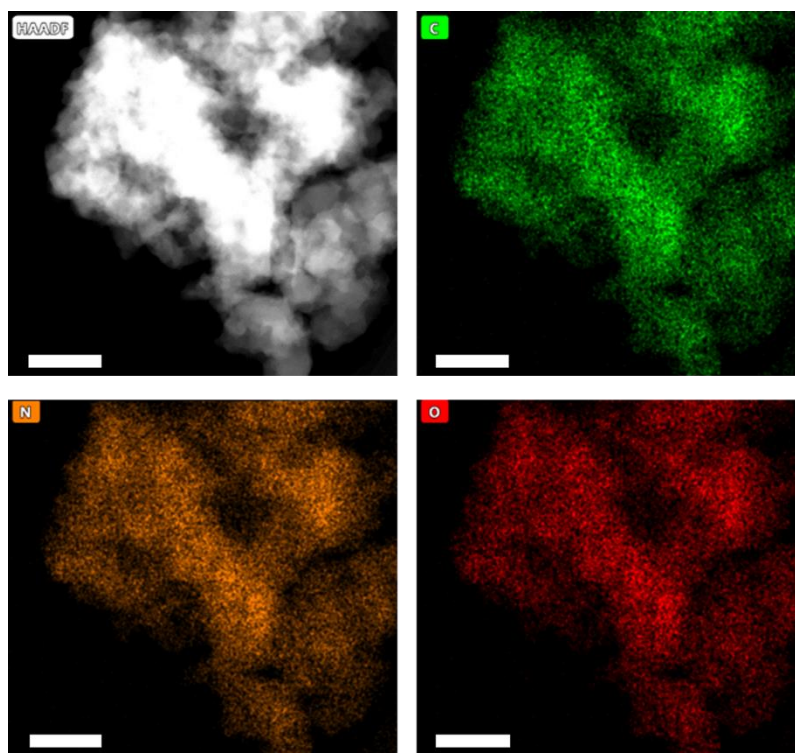

**Supplementary Figure 5. Corresponding elemental mapping of C, N, and O elements in TQBQ-COF from the HRTEM image. Scale bar, 200 nm.**

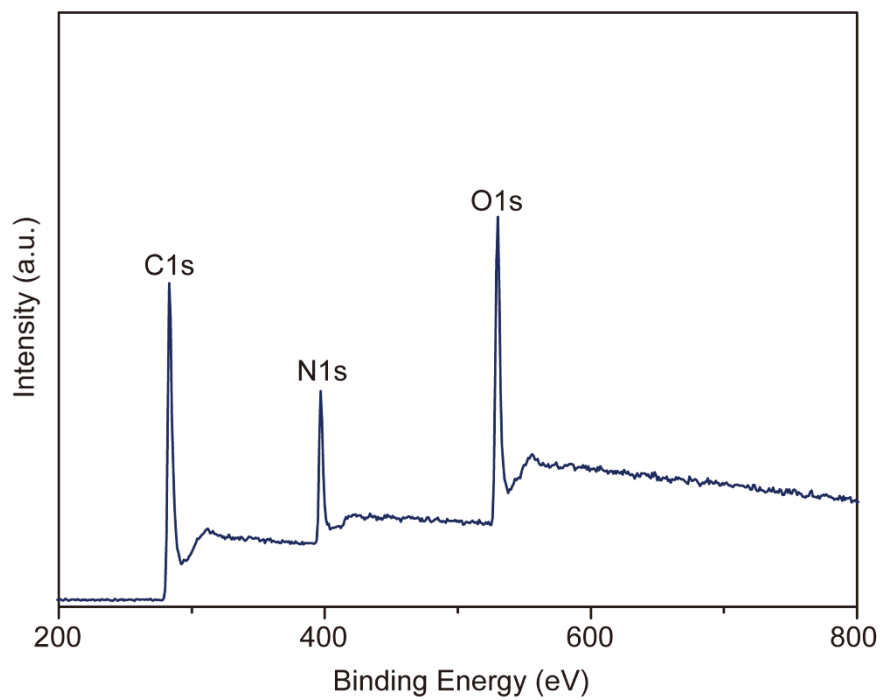

**Supplementary Figure 6. XPS survey spectrum of TQBQ-COF material.** The nitrogen element accounts for 26 wt%, which indicates a high nitrogen content for the TQBQ-COF material.

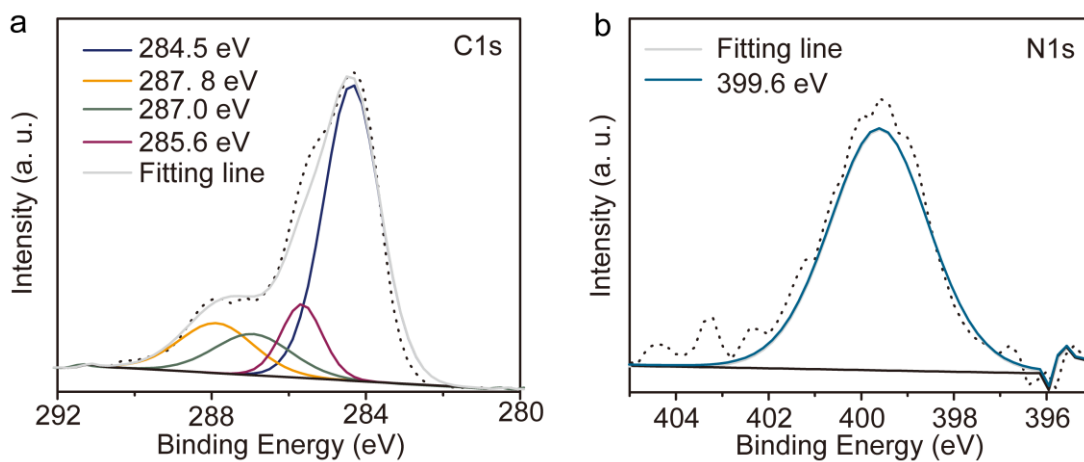

**Supplementary Figure 7. High-resolution XPS spectra of TQBQ-COF.** (a) High-resolution XPS C1s spectrum of TQBQ-COF. The peak at 285.6 eV can be assigned to the edge groups (C-O/C-N) of TQBQ-COF. (b) High-resolution XPS N1s spectrum of TQBQ-COF. The peak positions of C1s and N1s are corrected with the standard C1s peak (284.5 eV).



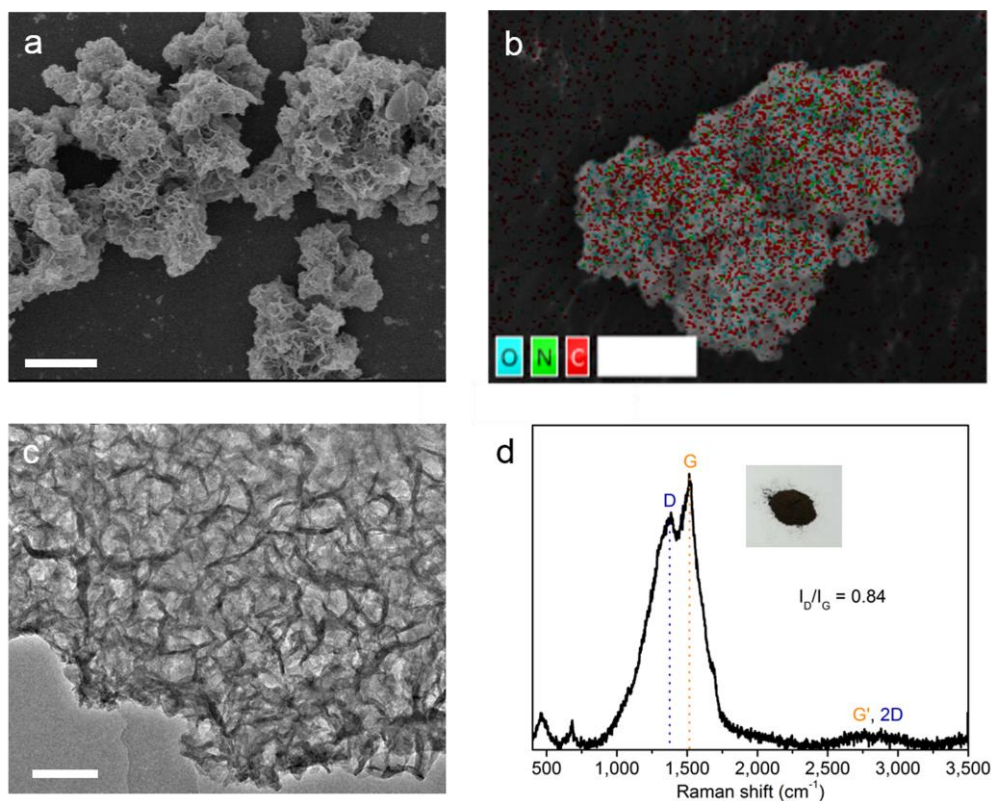

**Supplementary Figure 8. Morphology characterizations of TQBQ-COF.** (a) SEM image of TQBQ-COF. Scale bar, 1  $\mu\text{m}$ . (b) The corresponding mapping results of TQBQ-COF. Scale bar, 2.5  $\mu\text{m}$ . (c) HRTEM image of TQBQ-COF, showing a porous structure. Scale bar, 100 nm. (d) Raman spectrum of the TQBQ-COF powder. The value of  $I_D/I_G$  (0.84) suggests moderate defect level for the 2D structure of TQBQ-COF combined with the AFM and TEM results.

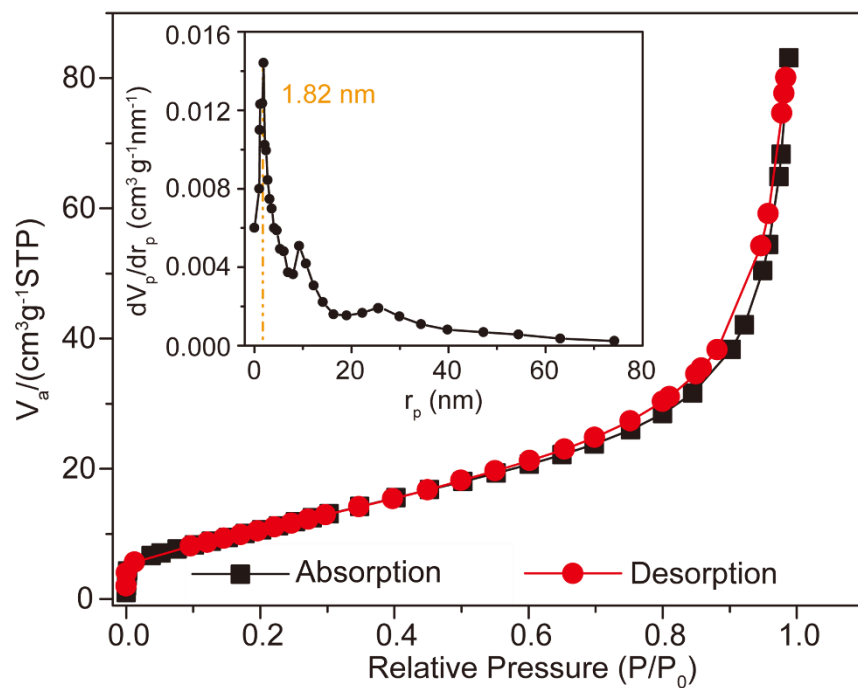

**Supplementary Figure 9.**  $\text{N}_2$  adsorption/desorption isotherms of the as-prepared TQBQ-COF. The inset figure is the corresponding pore size distributions of this sample.

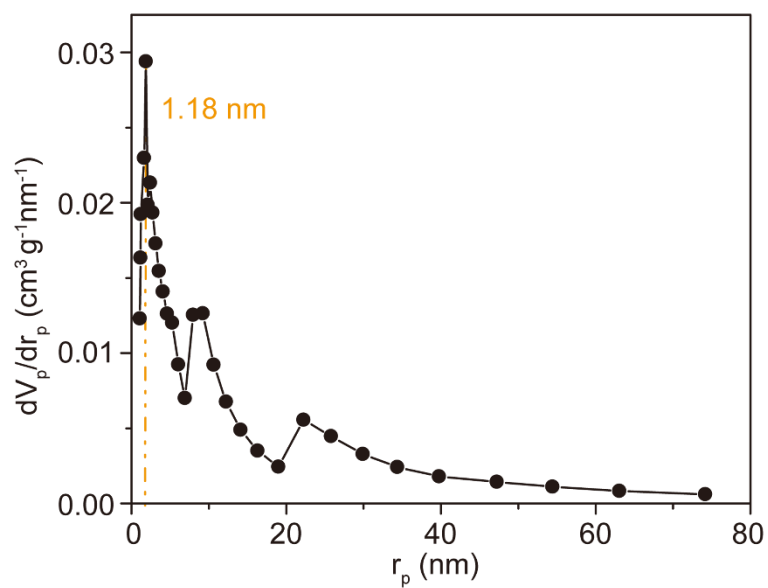

**Supplementary Figure 10. The corresponding pore size distributions of the heated sample.** The pore diameter is 1.18 nm, which is in agreement with the simulated pore size (11.4 Å) of one TQBQ-COF repetitive unit.

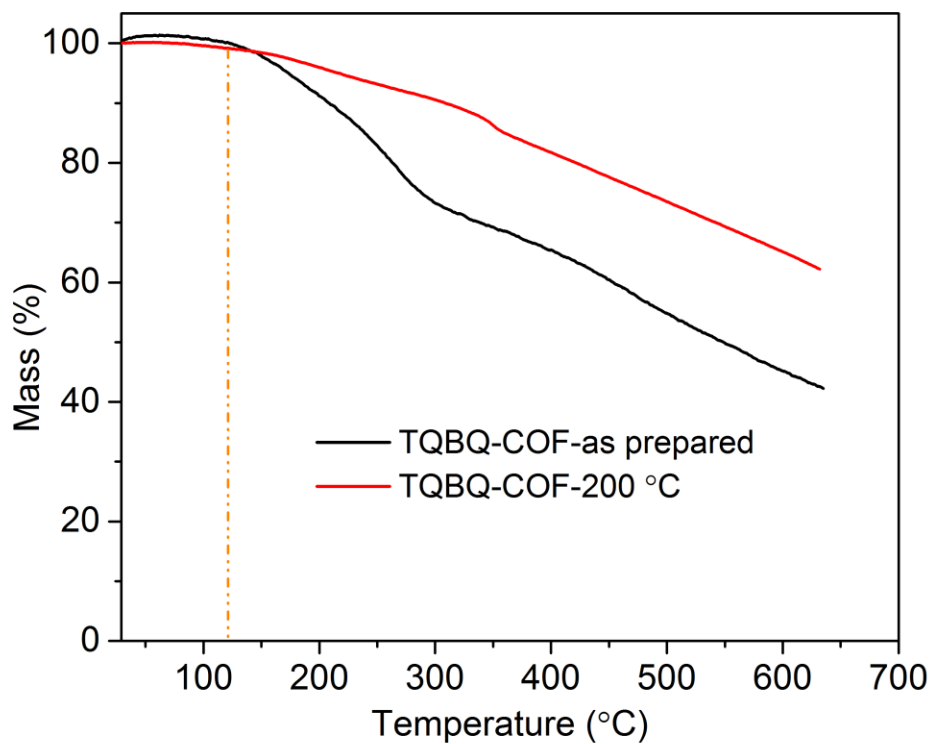

**Supplementary Figure 11. TG curves of the as-prepared TQBQ-COF and the heat-treated sample.** They are all dried in vacuum before the test, and the remarkable weight loss between 200 and 630 °C can be ascribed to the decomposition of the TQBQ-COF skeleton.

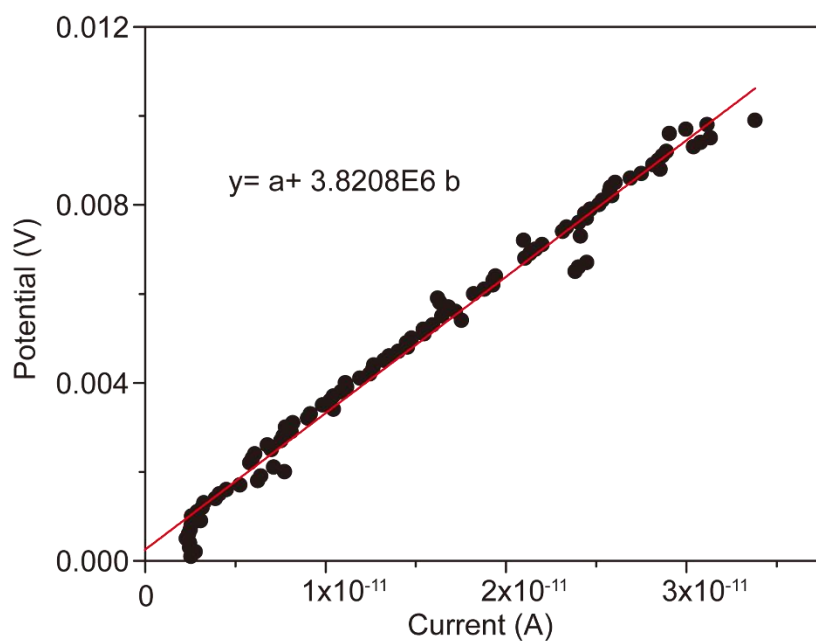

**Supplementary Figure 12. Linear sweep voltammetry curve of TQBQ-COF material tested in pellet (d = 13.0 mm, l = 0.1 mm).**

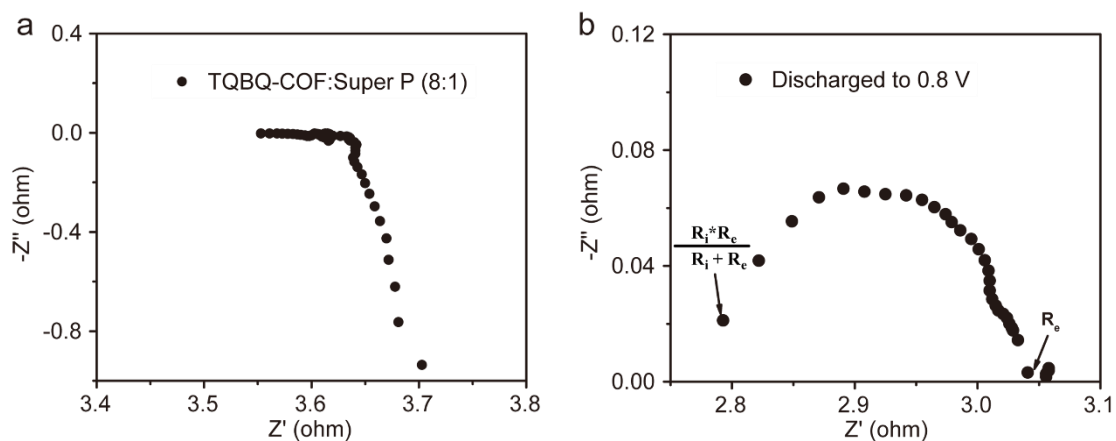

**Supplementary Figure 13. The electrochemical impedance frequency response measurement of the pristine and the discharged product.** (a) The conductive impedance of the pristine TQBQ-COF/Super P (8:1) mixture. (b) The conductive impedance of the discharged product (0.8 V) of TQBQ-COF/Super P. The thickness and surface area of disk electrode were 0.051 cm and 2.002 cm<sup>2</sup>, respectively. Detailed calculation process can be seen in the “Electrical/Ionic conductivity measurements” part of Supplementary Methods.

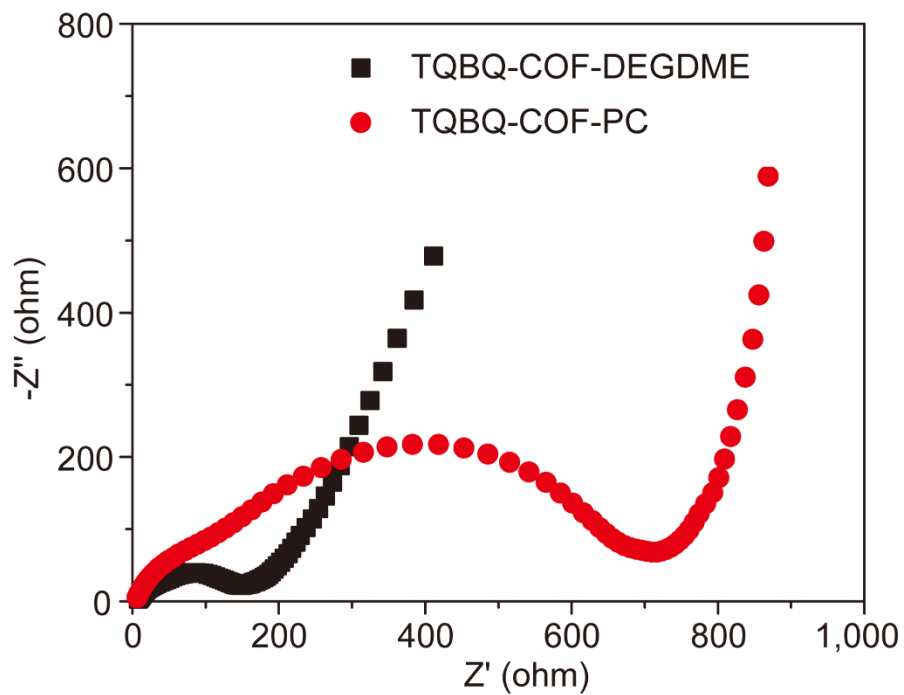

**Supplementary Figure 14. The EIS results of the two kinds of electrolytes, 1.0 M NaPF<sub>6</sub> in DEGDME and PC, respectively.**

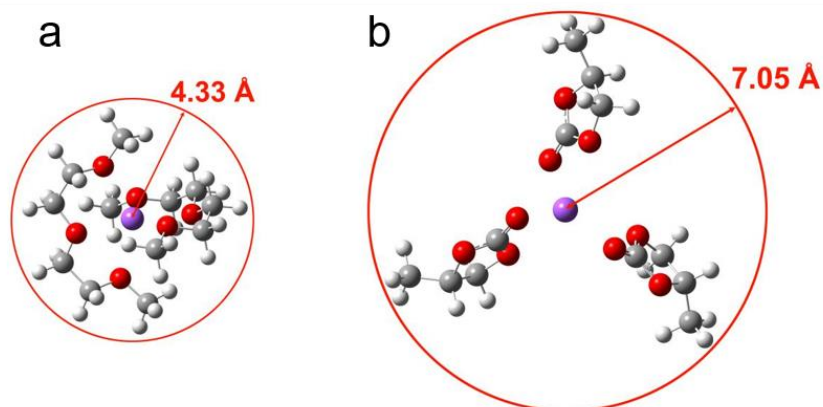

**Supplementary Figure 15. The solvation configuration of  $\text{Na}^+$  with different electrolytes.** (a) The solvation configuration radius of  $\text{Na}^+$  in DEGDM-based electrolyte. (b) The solvation configuration radius of  $\text{Na}^+$  in PC-based electrolyte. When the coordination number is set as 6 for consistency, the  $[\text{NaPC3}]^+$  particle (7.05 Å) is much larger in size than that of  $[\text{NaG22}]^+$  particle (4.33 Å).



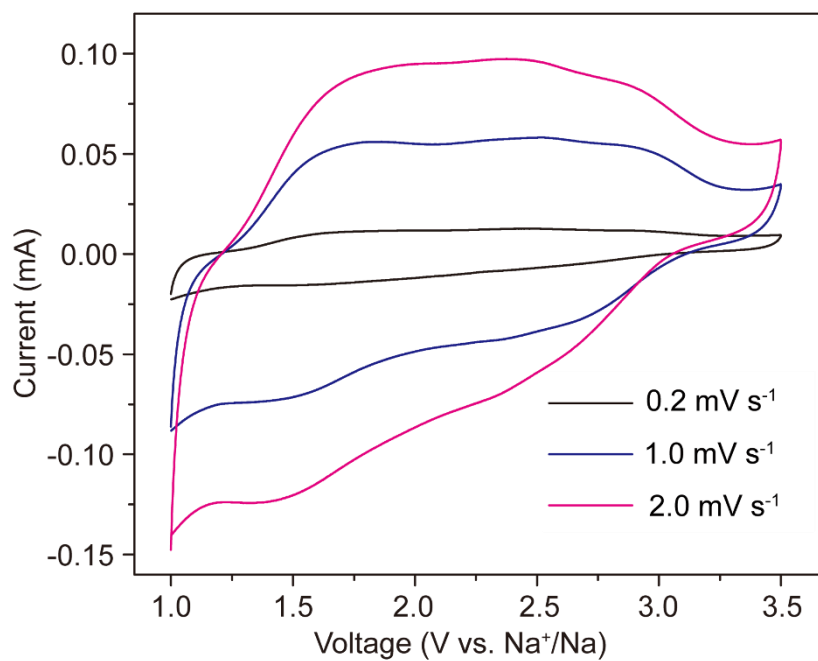

**Supplementary Figure 16. CV curves at different scan rates (0.2~2.0 mV s<sup>-1</sup>) of TQBQ-COF cathode in the PC-based electrolyte.** The  $D_{Na^+}$  was calculated by the same measurement of TQBQ-COF cathode in the DEGDMC-based electrolyte ( $\sim 10^{-11}$  cm<sup>2</sup> s<sup>-1</sup>).

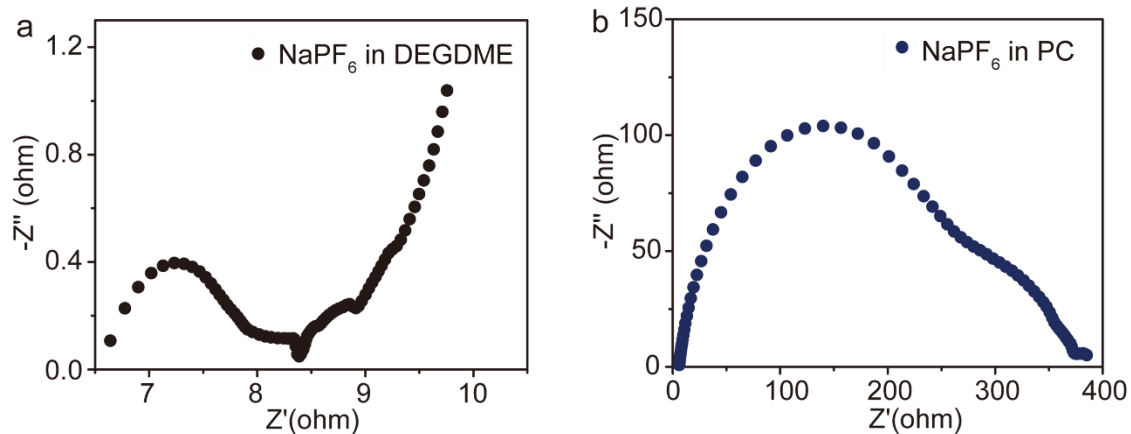

**Supplementary Figure 17. The EIS spectra of Na/Na symmetrical cells with different electrolytes.** (a) The EIS result in DEGDMC-based electrolyte. (b) The result in PC-based electrolyte. The PC-based electrolyte (380  $\Omega$ ) shows a higher charge transfer resistance than the DEGDMC-based electrolyte (8.4  $\Omega$ ) in the EIS measurement, which shows the interaction between Na anode and PC is the main reason for the high charge transfer resistance in the PC-based electrolyte.

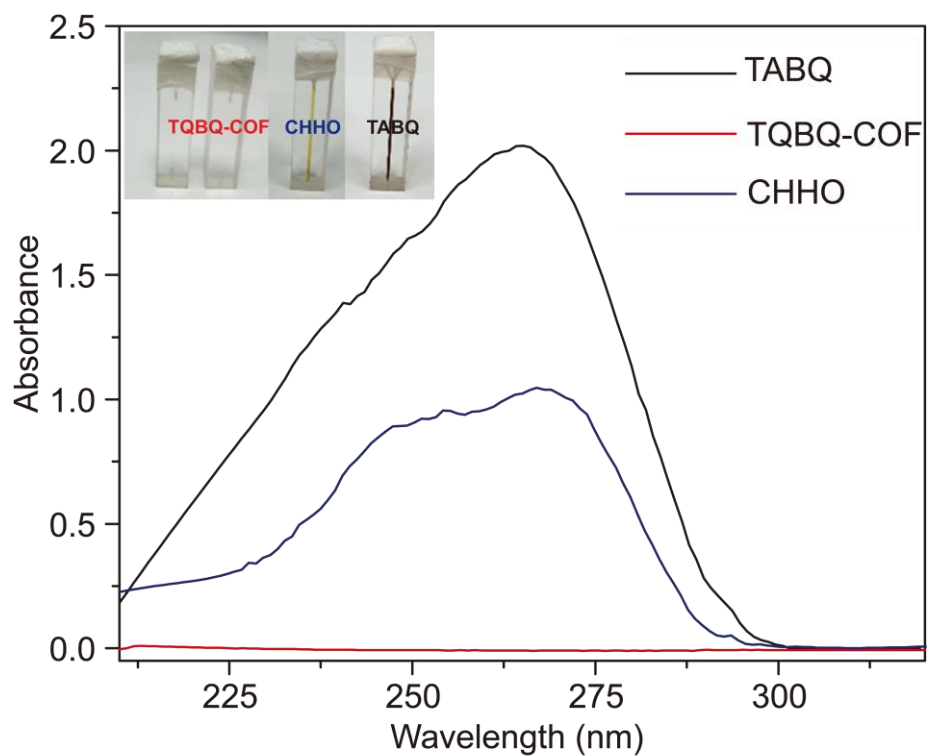

**Supplementary Figure 18. UV spectra of 1.0 M NaPF<sub>6</sub>/DEGDME solutions saturated with TQBQ-COF, CHHO, and TABQ, respectively.** The inset figures are corresponding to 1.0 M NaPF<sub>6</sub>/DEGDME (reference solution), TQBQ-COF-NaPF<sub>6</sub>/DEGDME, CHHO-NaPF<sub>6</sub>/DEGDME, and TABQ-NaPF<sub>6</sub>/DEGDME, respectively.

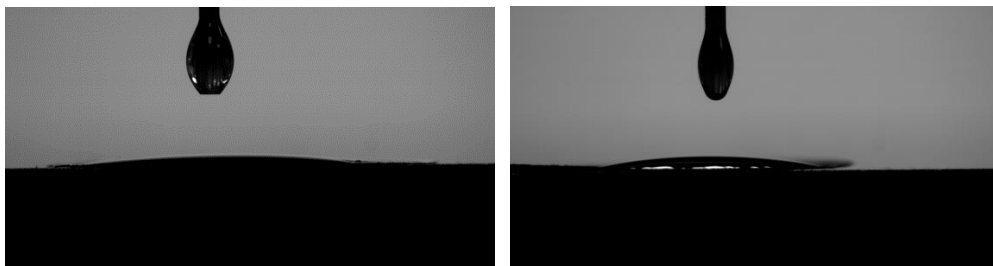

**Supplementary Figure 19. Contact angle of the electrolyte of 1.0 M NaPF<sub>6</sub>/DEGDME with the TQBQ-COF electrode plate.** The TQBQ-COF electrode could be wetted in 5 s, showing good compatibility between the electrolyte and the TQBQ-COF cathode.

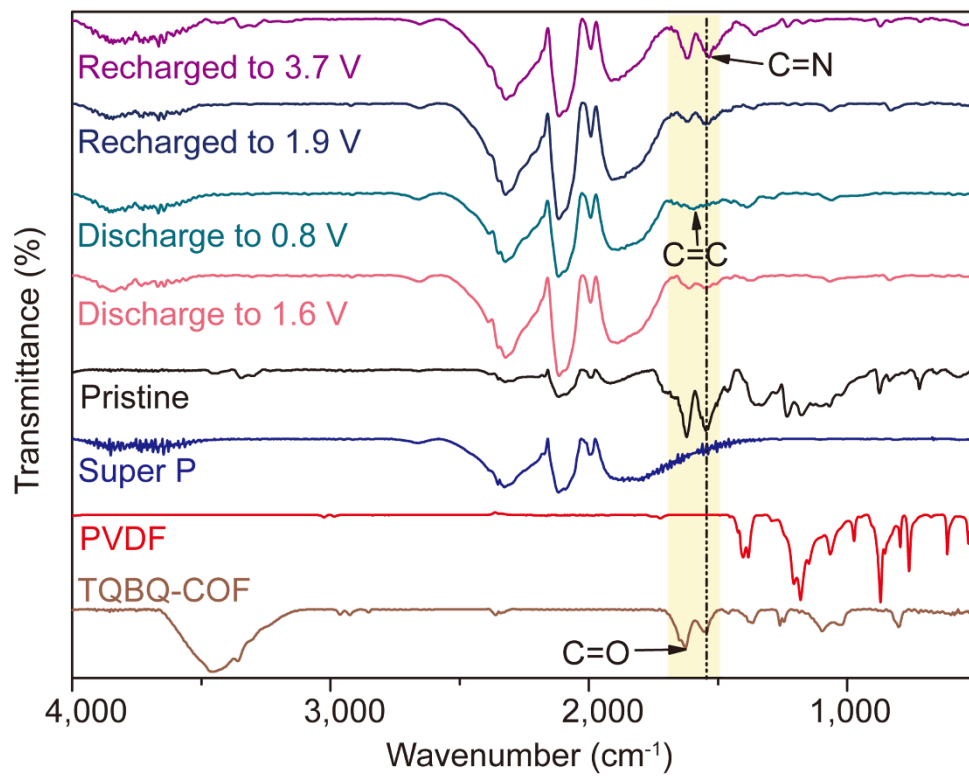

**Supplementary Figure 20. FTIR spectra of TQBQ-COF, PVDF, Super P and the products of TQBQ-COF electrodes at different discharged/charged states. The characteristic peaks mainly changed range from 1,700 to 1,200  $\text{cm}^{-1}$ .**

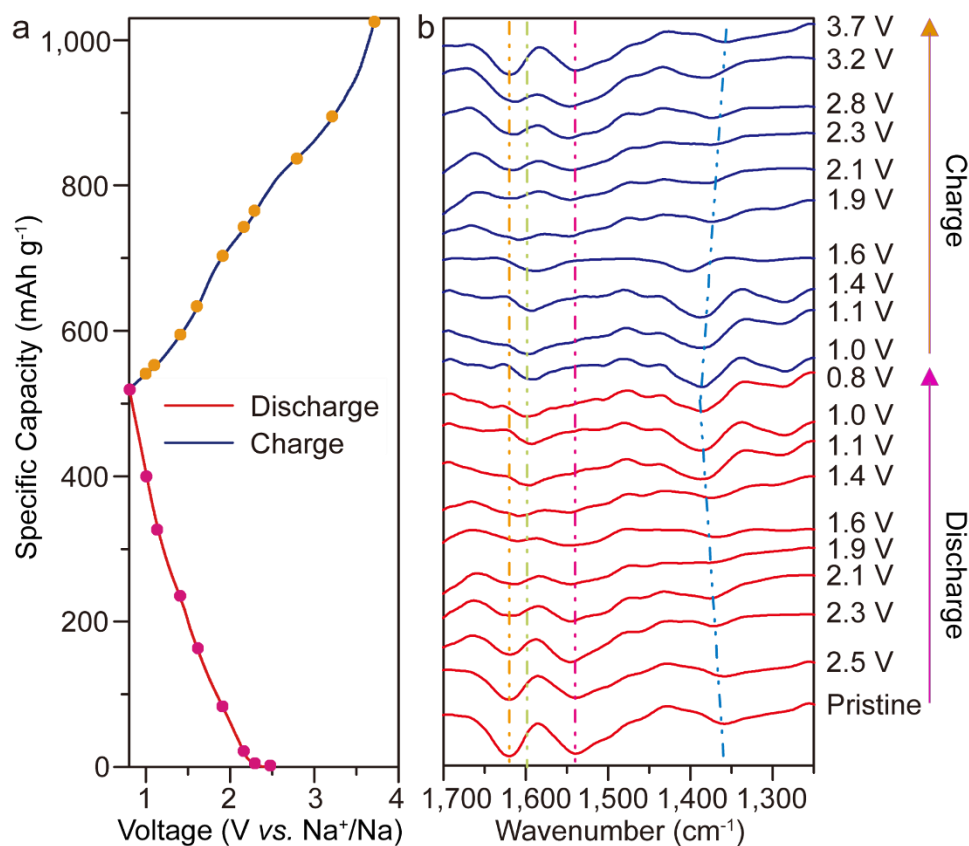

**Supplementary Figure 21. Ex-situ FTIR spectra of TQBQ-COF electrodes at different discharge-charge states.** (a) The first discharge/charge cycle of TQBQ-COF electrode at 0.02 A g<sup>-1</sup> in the voltage range of 0.8~3.7 V. (b) Ex-situ FTIR spectra of TQBQ-COF electrodes collected at the indicated states in (a).

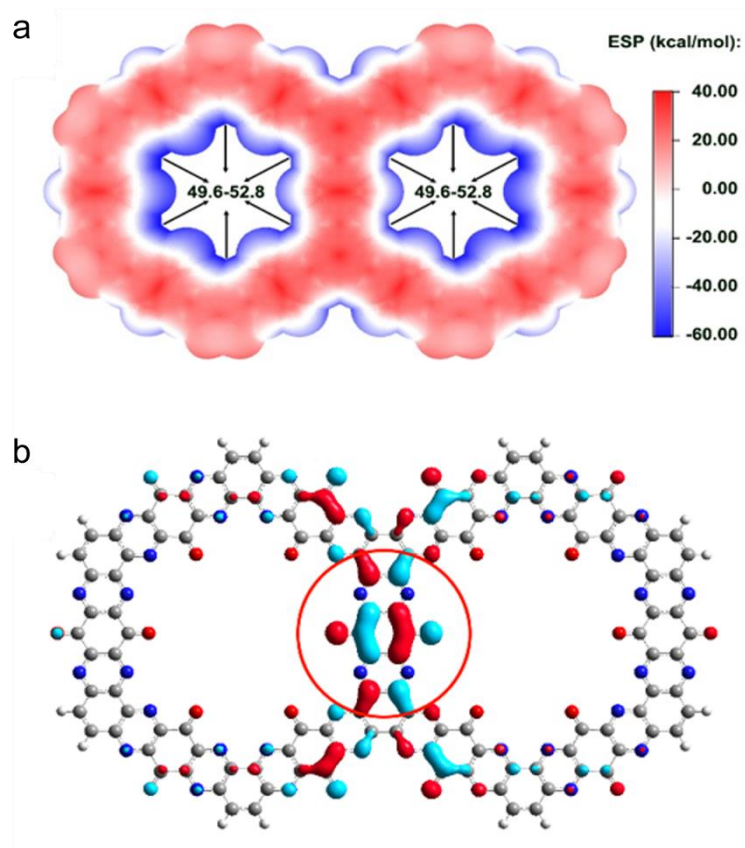

**Supplementary Figure 22. The DFT calculations for the two TQBQ-COF repetitive units.** The MESP (a) and LUMO (b) patterns of two TQBQ-COF repetitive units. The MESP on the two-unit TQBQ-COF surface minima indicates the same affinity of the para-positioned C=O groups to  $\text{Na}^+$  ions, and the symmetrical attribution of LUMO pattern on the C=O groups in the red circle also exhibits the same reaction activity.

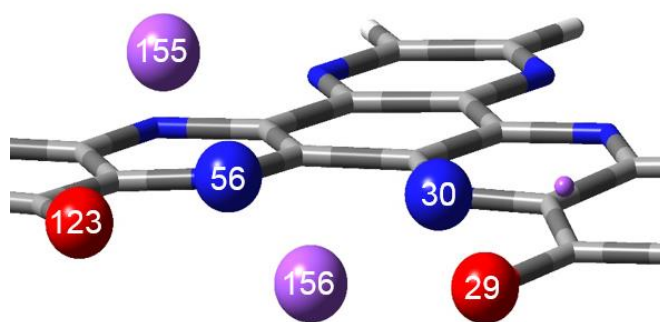

**Supplementary Figure 23. The schematic structures of the Na-155 bond and Na-156 bond level analysis in two different coordination environments of TQBQ-COF, respectively.**



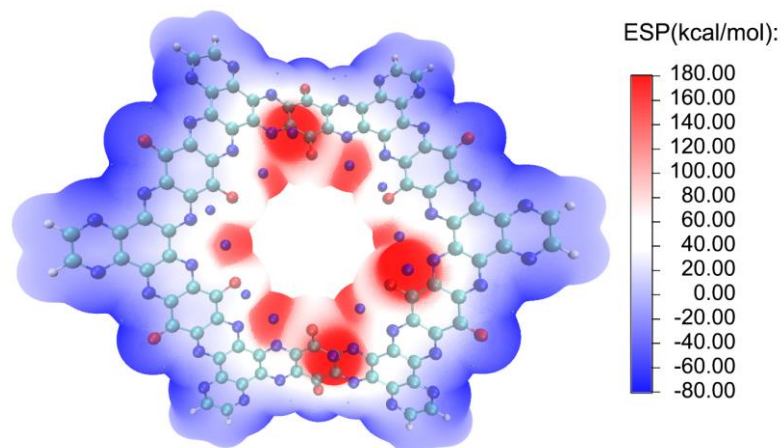

**Supplementary Figure 24. Further MESP calculation on Na<sub>12</sub>TQBQ-COF.** There was no Na accommodation site in the unit ring of TQBQ-COF after twelve sodium-ion storage.

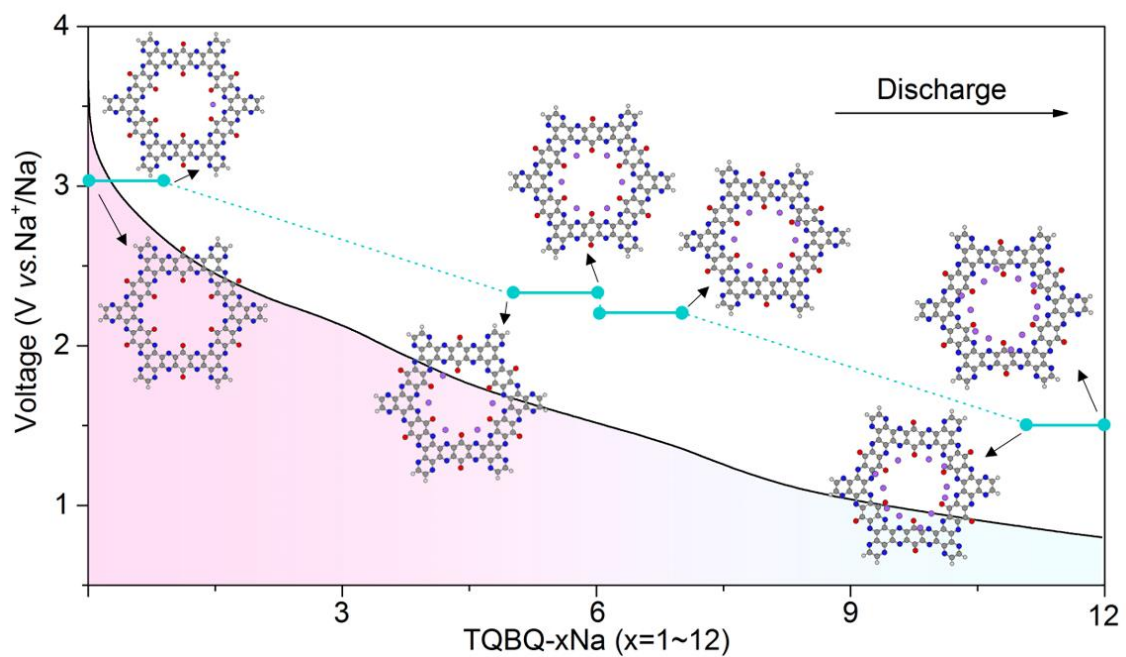

**Supplementary Figure 25. The calculated average potentials versus Na/Na<sup>+</sup> during the selected sodiation states.**

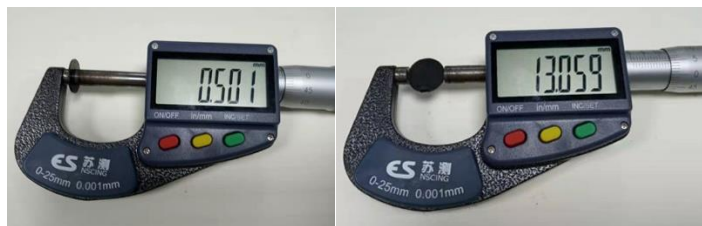

**Supplementary Figure 26. The TQBQ-COF pellet was obtained by classic powder's pressing method (14 MPa). The weight, thickness and diameter of the resulting pellet were 109.1 mg, 0.501 mm, and 13.06 mm, respectively. The molar volume ( $V_m$ ) of the repeating unit of TQBQ-COF is about  $383.7 \text{ cm}^3 \text{ mol}^{-1}$ .**

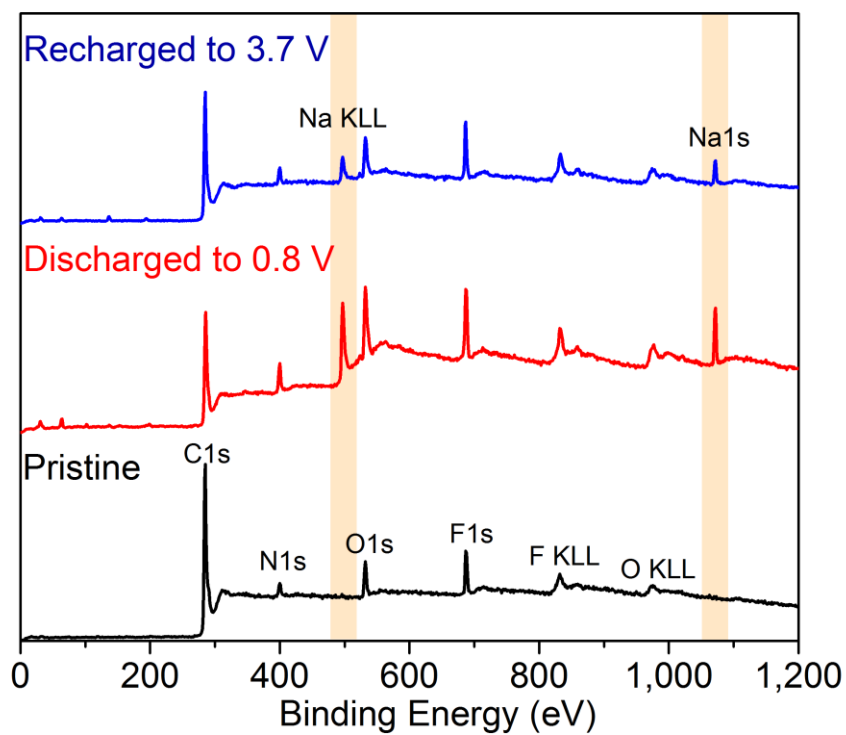

**Supplementary Figure 27. Wide XPS spectra of TQBQ-COF electrodes at pristine, discharged (0.8 V), and recharged (3.7 V) states.**

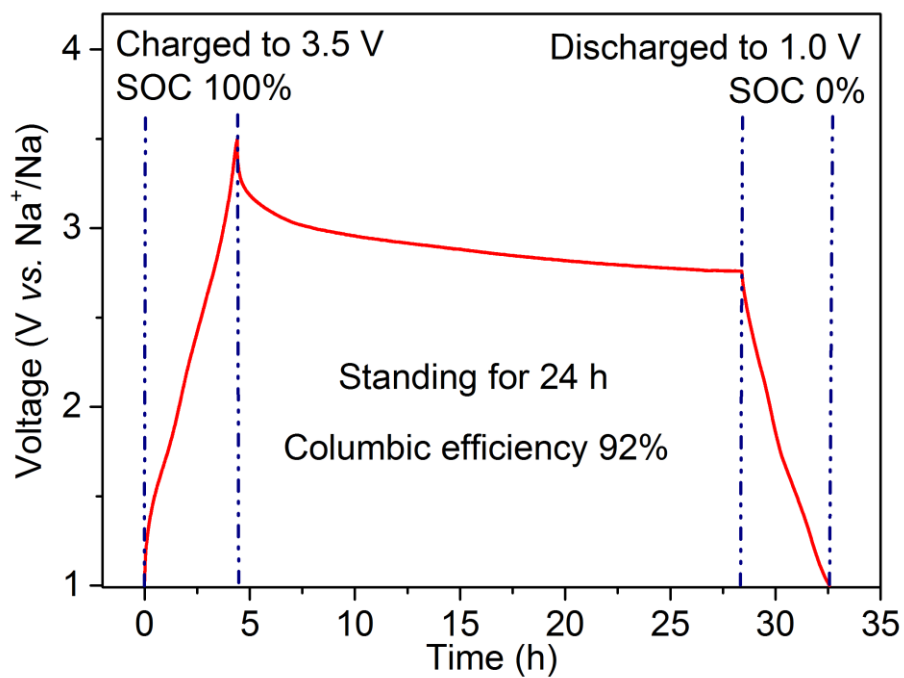

**Supplementary Figure 28. Self-discharge performance of the TQBQ-COF sodium battery evaluated by standing for 24 h at 100% state of charging (SOC) after the initial five cycles at 0.2 C (1 C = 400 mAh g<sup>-1</sup>), followed by discharging to 1.0 V.**

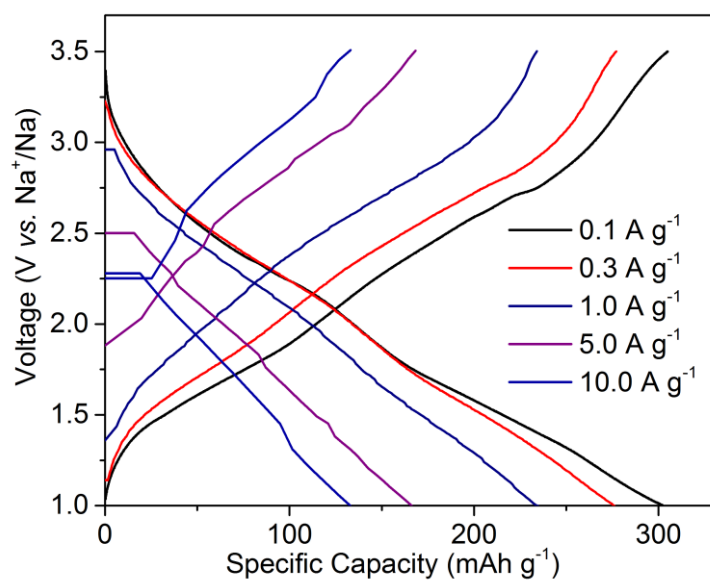

**Supplementary Figure 29. Charge–discharge curves of the TQBQ-COF electrode at the current densities from 0.1 to 10 A g<sup>-1</sup>.**

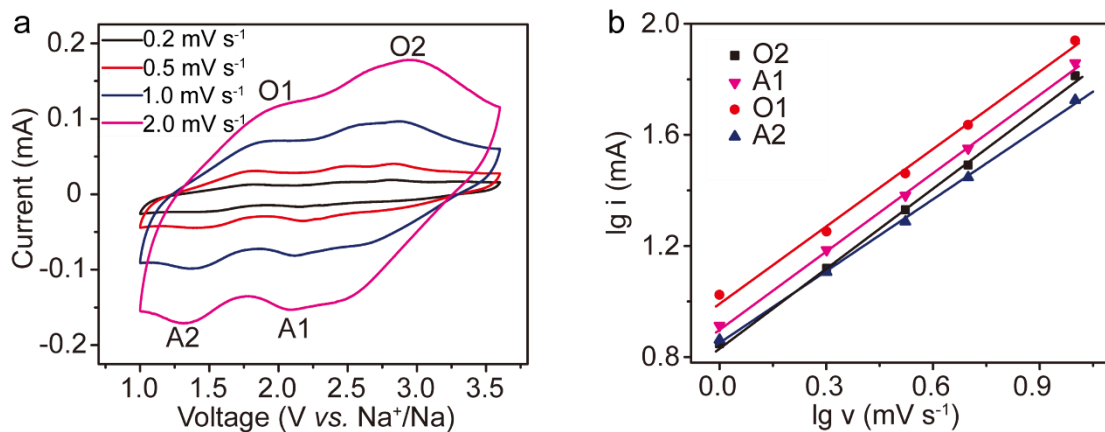

**Supplementary Figure 30. CV curves of the TQBQ-COF cathode at different scan rates.** (a) CV curves of TQBQ-COF cathode at different scan rates (0.2~2 mV s<sup>-1</sup>). (b) The corresponding linear fit of the peak current vs. the scan rate. The values of b are close to 1.0, showing a capacitive process for Na<sup>+</sup> storage.

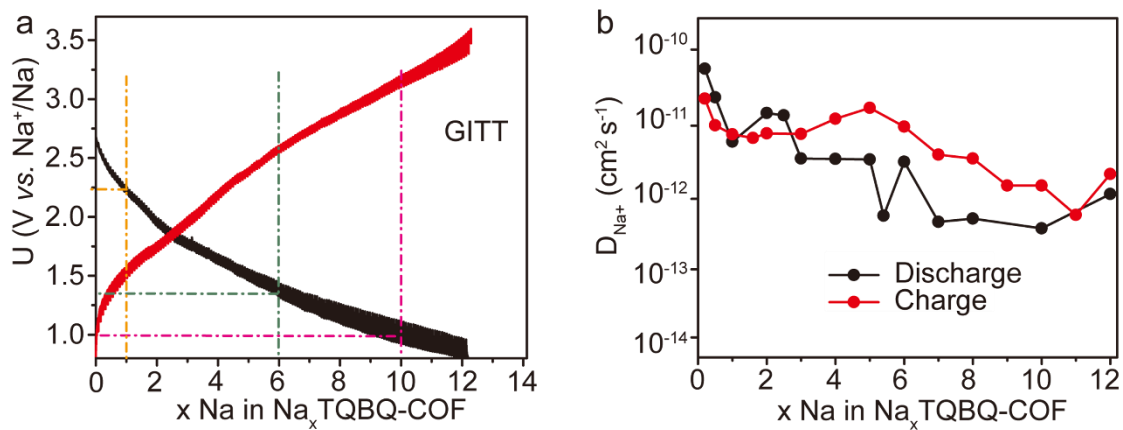

**Supplementary Figure 31. The GITT result corresponds to the twelve Na<sup>+</sup> storage in TQBQ-COF.** (a) Voltage-composition profile of TQBQ-COF electrode discharged to 0.8 V and recharged to 3.6 V in a GITT mode using an intermittent current rate of C/20 and periodic interruption to reach nearly equilibrium. (b) Diffusivity coefficient of Na<sup>+</sup> calculated from GITT methods versus the sodiation/desodiation of Na<sub>x</sub>TQBQ-COF.



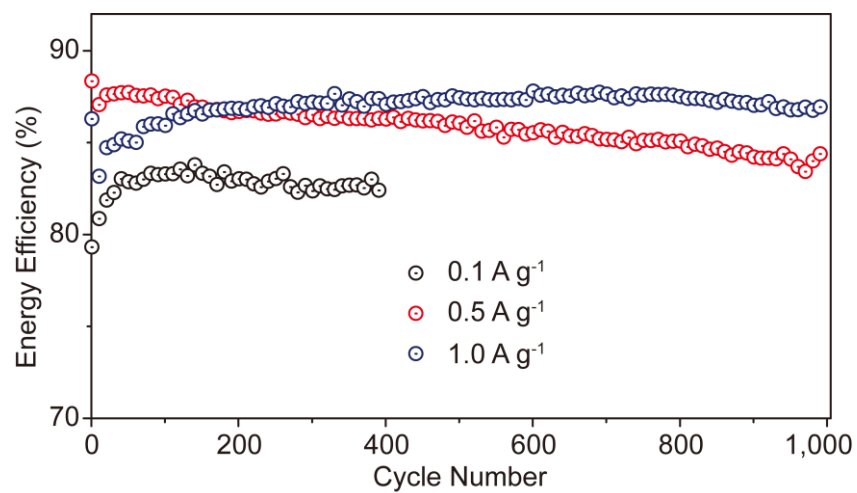

**Supplementary Figure 32. The energy efficiency of TQBQ-COF electrodes at 0.1 A g<sup>-1</sup>, 0.5 A g<sup>-1</sup>, and 1.0 A g<sup>-1</sup>, respectively. The values of the energy efficiency are around 85%.**

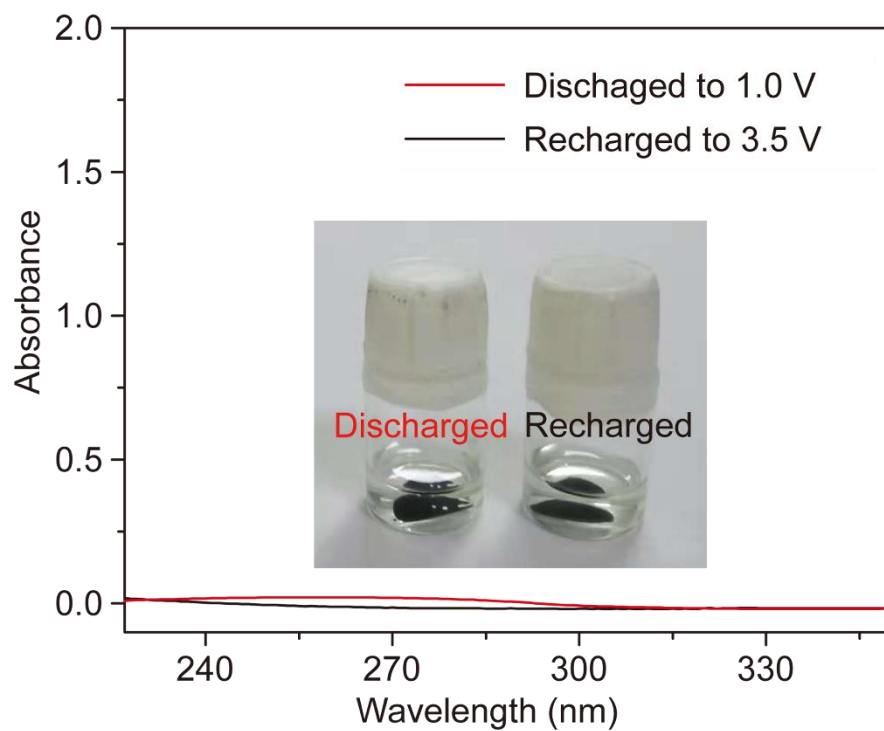

**Supplementary Figure 33. UV-vis spectra of TQBQ-COF electrodes in pristine, the discharged (1.0 V), and recharged (3.5 V) states after the immersion in the NaPF<sub>6</sub>/DEGDME solutions for 24 h, respectively. The insets are the corresponding dissolution behavior of them, showing no color change after discharged and recharged states.**

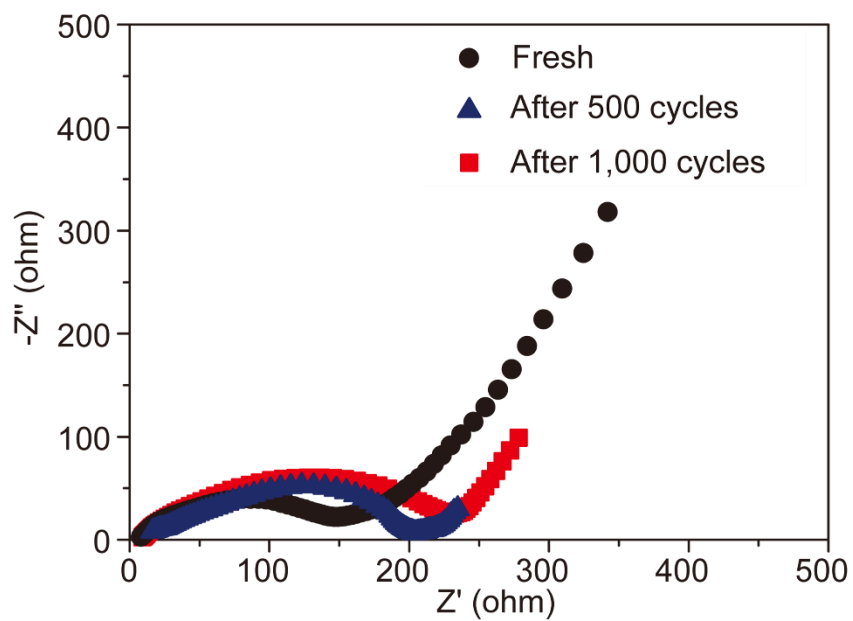

**Supplementary Figure 34.** The EIS results of TQBQ-COF electrodes in NaPF<sub>6</sub>/DEGDME electrolyte before and after 500 or 1,000 cycles.

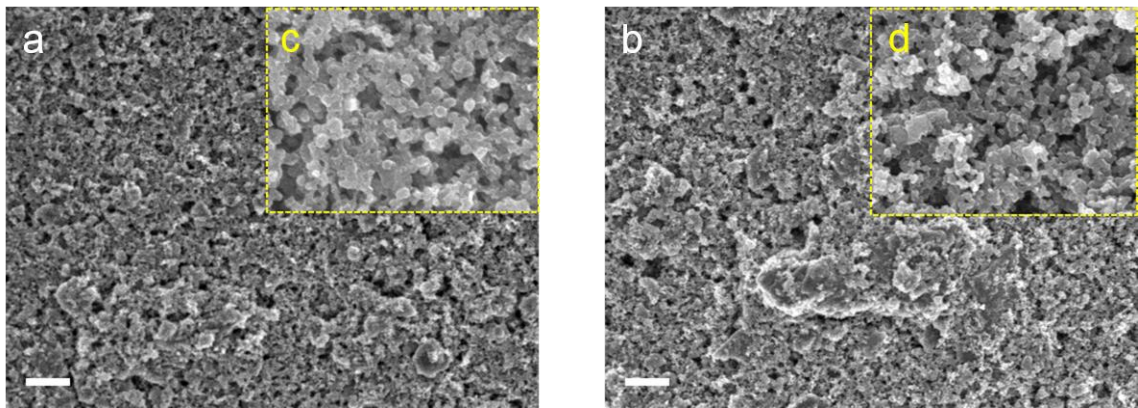

**Supplementary Figure 35. Morphology comparison of TQBQ-COF electrodes before and after 500 cycles.** (a) SEM image of the pristine state of TQBQ-COF electrode. Scale bar, 2  $\mu\text{m}$ . (b) SEM image of the recharged state of TQBQ-COF electrode after 500 cycles. Scale bar, 2  $\mu\text{m}$ . The insert images (c, d) are the corresponding amplified areas of (a) and (b), respectively, which both show uniform distribution of TQBQ-COF and Super P before and after long cycles.

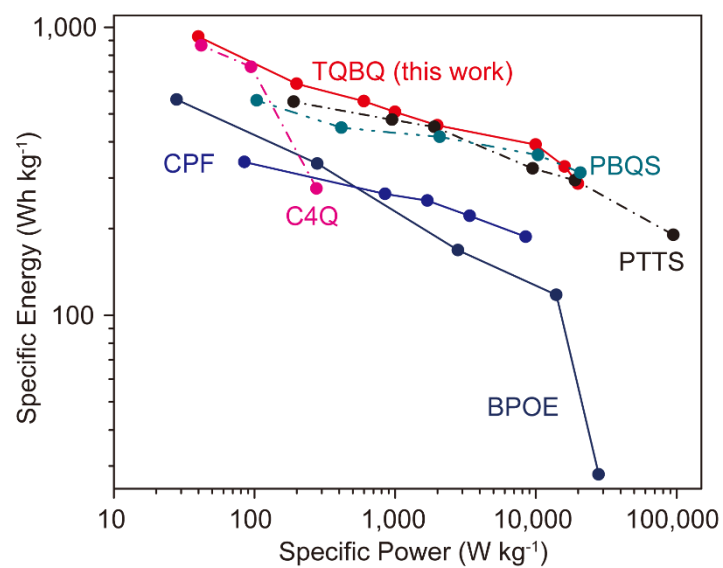

**Supplementary Figure 36. Ragone plot of the TQBQ-COF electrode compared with the current reported organic cathodes for sodium batteries (the COFs-based cathodes indicated in solid line).**

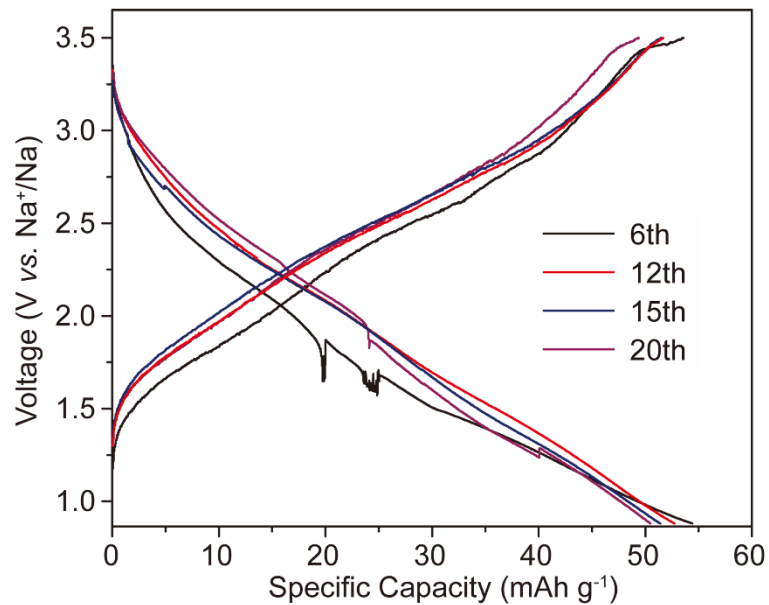

**Supplementary Figure 37. The selected charge/discharge curves of pouch-type TQBQ-COF//Na battery at 50 mA.** It shows a specific capacity of 54.4 mAh g<sup>-1</sup> for the 6th cycle based on the whole mass of the pouch-type sodium battery, and the initial five cycles are used to optimize the testing conditions (cell formation, testing press, current density et al.).

**Supplementary Table 1. Element compositions of the theoretical calculation, elemental analysis (EA), and EDS mapping results of TQBQ-COF.**

|                            | <b>C</b> | <b>N</b> | <b>O</b> | <b>H</b> |
|----------------------------|----------|----------|----------|----------|
| <b>Theoretical (wt. %)</b> | 57.69    | 26.92    | 15.38    | 0        |
| <b>EA</b>                  | 53.12    | 23.76    | 21.95    | 2.17     |
| <b>EDS Mapping</b>         | 48.89    | 21.24    | 26.43    | 3.44     |

**Supplementary Table 2. The atomic coordinates of Na<sub>12</sub>TQBQ-COF.**

| Center Number | Element | Coordinates(Angstroms) |                |           | Center Number | Element | Coordinates(Angstroms) |           |           |
|---------------|---------|------------------------|----------------|-----------|---------------|---------|------------------------|-----------|-----------|
|               |         | X                      | Y              | Z         |               |         | X                      | Y         | Z         |
| 1             | C       | -4.519694              | -9.372999      | -1.881021 | 79            | C       | 8.042588               | 5.085396  | 0.637012  |
| 2             | C       | -3.276814              | -8.626956      | -1.734586 | 80            | C       | 6.833824               | 5.591012  | -0.104201 |
| 3             | C       | -3.323088              | -7.306217      | -1.237345 | 81            | C       | 5.693785               | 4.70929   | -0.347083 |
| 4             | C       | -4.590126              | -6.657772      | -0.946964 | 82            | C       | 5.709502               | 3.328206  | -0.06617  |
| 5             | C       | -5.778859              | -7.408551      | -0.971795 | 83            | N       | 11.522903              | -0.976892 | 2.610667  |
| 6             | C       | -5.754536              | -8.776082      | -1.473922 | 84            | N       | 11.442597              | 1.835079  | 2.432845  |
| 7             | N       | -6.914299              | -9.459206      | -1.560857 | 85            | O       | 4.678155               | 2.507588  | -0.431912 |
| 8             | N       | -6.93877               | -6.856275      | -0.510679 | 86            | O       | 8.956909               | 5.816603  | 0.974615  |
| 9             | N       | -4.552997              | -5.351297      | -0.606675 | 87            | N       | 4.558893               | 5.25483   | -0.915154 |
| 10            | N       | -2.216039              | -6.612477      | -0.95066  | 88            | N       | 6.862624               | 6.835028  | -0.519803 |
| 11            | N       | -2.079545              | -9.183005      | -2.040607 | 89            | C       | 4.58918                | 6.568932  | -1.228931 |
| 12            | N       | -4.480148              | -10.62691<br>2 | -2.371531 | 90            | C       | 5.752026               | 7.352638  | -1.118803 |
| 13            | C       | -6.9286                | -5.605643      | -0.115064 | 91            | C       | 5.743565               | 8.72551   | -1.606951 |
| 14            | C       | -5.737477              | -4.763403      | -0.211548 | 92            | C       | 4.527429               | 9.315287  | -2.073703 |
| 15            | C       | -5.752753              | -3.375634      | 0.02246   | 93            | C       | 3.286444               | 8.555663  | -1.996781 |
| 16            | C       | -6.993466              | -2.806018      | 0.430233  | 94            | C       | 3.329532               | 7.208198  | -1.574648 |
| 17            | C       | -8.192551              | -3.570482      | 0.708679  | 95            | N       | 2.219585               | 6.49606   | -1.350883 |
| 18            | C       | -8.216322              | -5.046515      | 0.436585  | 96            | N       | 2.091492               | 9.136113  | -2.265247 |
| 19            | C       | -0.980931              | -8.505228      | -1.762179 | 97            | N       | 4.500788               | 10.576763 | -2.545168 |
| 20            | C       | -1.016185              | -7.207203      | -1.120087 | 98            | N       | 6.898339               | 9.421919  | -1.614595 |
| 21            | C       | 0.337847               | -9.13671       | -2.09196  | 99            | C       | 1.023386               | 7.107819  | -1.474833 |
| 22            | C       | 1.524369               | -8.469634      | -1.44687  | 100           | C       | 0.990804               | 8.450552  | -2.015807 |
| 23            | C       | 1.375887               | -7.177713      | -0.780034 | 101           | C       | -0.327445              | 9.129153  | -2.244847 |
| 24            | C       | 0.132281               | -6.533032      | -0.613163 | 102           | C       | -1.486513              | 8.469087  | -1.54429  |
| 25            | O       | 0.012808               | -5.378905      | 0.111369  | 103           | C       | -1.350045              | 7.106306  | -1.03281  |
| 26            | O       | 0.442921               | -10.11761<br>6 | -2.80653  | 104           | C       | -0.125224              | 6.411299  | -0.995524 |
| 27            | O       | -9.197519              | -5.740445      | 0.636108  | 105           | O       | -0.008068              | 5.19522   | -0.384921 |
| 28            | O       | -4.650952              | -2.595115      | -0.185127 | 106           | O       | -0.449183              | 10.140533 | -2.911959 |
| 29            | N       | -9.286197              | -3.01124       | 1.195672  | 107           | N       | -2.463199              | 6.506868  | -0.479628 |
| 30            | N       | -7.035799              | -1.467883      | 0.586412  | 108           | N       | -2.575711              | 9.18162   | -1.381261 |
| 31            | N       | 2.664674               | -9.116339      | -1.485441 | 109           | C       | -3.641539              | 8.609557  | -0.745543 |
| 32            | N       | 2.496718               | -6.596517      | -0.223932 | 110           | C       | -3.578909              | 7.259378  | -0.36195  |
| 33            | C       | -9.285978              | -1.674426      | 1.417586  | 111           | C       | -4.843098              | 9.381551  | -0.454732 |
| 34            | C       | -8.151815              | -0.912312      | 1.066778  | 112           | C       | -5.964194              | 8.763071  | 0.187531  |
| 35            | C       | 3.762867               | -8.543525      | -0.915898 | 113           | C       | -5.924378              | 7.338572  | 0.492387  |



|    |   |                |                |           |     |    |            |            |           |
|----|---|----------------|----------------|-----------|-----|----|------------|------------|-----------|
| 36 | C | 3.664451       | -7.269045      | -0.32712  | 114 | C  | -4.76459   | 6.604653   | 0.160931  |
| 37 | C | -8.129292      | 0.528315       | 1.24458   | 115 | N  | -4.708322  | 5.274596   | 0.27152   |
| 38 | C | -9.211417      | 1.186363       | 1.856812  | 116 | N  | -6.973964  | 6.702165   | 1.069545  |
| 39 | C | -10.38375<br>9 | 0.413108       | 2.250938  | 117 | N  | -7.069386  | 9.46981    | 0.492131  |
| 40 | C | -10.42996<br>4 | -0.999207      | 2.019825  | 118 | N  | -4.87122   | 10.689586  | -0.782369 |
| 41 | C | 5.03869        | -9.246994      | -0.911082 | 119 | C  | -5.801763  | 4.61435    | 0.703757  |
| 42 | C | 6.200244       | -8.625235      | -0.358778 | 120 | C  | -6.922604  | 5.388043   | 1.199375  |
| 43 | C | 6.111613       | -7.266455      | 0.15809   | 121 | C  | -8.085986  | 4.689497   | 1.845463  |
| 44 | C | 4.864783       | -6.602497      | 0.151043  | 122 | C  | -5.798346  | 3.197508   | 0.592888  |
| 45 | N | 5.098605       | -10.49201<br>9 | -1.426667 | 123 | O  | -4.796655  | 2.534118   | -0.066781 |
| 46 | N | 7.386006       | -9.26431       | -0.328521 | 124 | O  | -8.960743  | 5.284513   | 2.449624  |
| 47 | N | 7.209817       | -6.624242      | 0.622723  | 125 | C  | -7.06783   | 10.755104  | 0.164596  |
| 48 | N | 4.737967       | -5.321371      | 0.517149  | 126 | C  | -5.972391  | 11.36131   | -0.475617 |
| 49 | C | 7.099727       | -5.354552      | 0.963976  | 127 | C  | 6.845443   | 10.662025  | -2.080959 |
| 50 | C | 5.847875       | -4.63196       | 0.856972  | 128 | C  | 5.65087    | 11.237313  | -2.549924 |
| 51 | C | 6.276263       | -11.09903<br>4 | -1.387507 | 129 | C  | 12.571986  | -0.220296  | 2.901349  |
| 52 | C | 7.417651       | -10.48847<br>9 | -0.8366   | 130 | C  | 12.531624  | 1.183135   | 2.816363  |
| 53 | N | -11.42201<br>2 | 1.053401       | 2.825357  | 131 | C  | -5.634638  | -11.274529 | -2.451684 |
| 54 | N | -9.167619      | 2.536964       | 2.041766  | 132 | C  | -6.847925  | -10.692483 | -2.042716 |
| 55 | N | -11.51198<br>4 | -1.724605      | 2.362446  | 133 | H  | 8.372684   | -11.010648 | -0.812054 |
| 56 | N | -7.028818      | 1.173338       | 0.812896  | 134 | H  | 6.328336   | -12.104147 | -1.803113 |
| 57 | C | -6.949613      | 2.524319       | 1.047625  | 135 | H  | 13.47984   | -0.733381  | 3.214716  |
| 58 | C | -8.092212      | 3.192072       | 1.665907  | 136 | H  | 13.405554  | 1.782446   | 3.066245  |
| 59 | C | -12.47355      | 0.316177       | 3.154741  | 137 | H  | 7.776284   | 11.226934  | -2.089309 |
| 60 | C | -12.52034<br>3 | -1.069766      | 2.921735  | 138 | H  | 5.635678   | 12.25562   | -2.934822 |
| 61 | C | 8.328069       | -4.65764       | 1.468934  | 139 | H  | -7.958292  | 11.330568  | 0.411989  |
| 62 | C | 8.200807       | -3.161119      | 1.562355  | 140 | H  | -5.996985  | 12.417123  | -0.740885 |
| 63 | C | 6.916562       | -2.513254      | 1.30597   | 141 | H  | -13.312625 | 0.83175    | 3.619267  |
| 64 | C | 5.729258       | -3.223338      | 1.029634  | 142 | H  | -13.397128 | -1.652976  | 3.198243  |
| 65 | O | 4.525869       | -2.581955      | 0.895026  | 143 | H  | -7.782699  | -11.246566 | -2.112783 |
| 66 | O | 9.347543       | -5.252454      | 1.771508  | 144 | H  | -5.608009  | -12.287261 | -2.850417 |
| 67 | N | 9.278996       | -2.484964      | 1.881588  | 145 | Na | -4.330014  | -3.599599  | -2.115446 |
| 68 | N | 6.85508        | -1.137141      | 1.366604  | 146 | Na | -2.285923  | -4.688282  | 0.23645   |
| 69 | C | 9.216288       | -1.123943      | 1.903371  | 147 | Na | 2.882851   | -4.129519  | 0.00384   |

---

|    |   |           |           |          |     |    |           |           |           |
|----|---|-----------|-----------|----------|-----|----|-----------|-----------|-----------|
| 70 | C | 8.008606  | -0.471572 | 1.593034 | 148 | Na | 1.155504  | -6.42817  | 1.694565  |
| 71 | C | 10.400668 | -0.337126 | 2.223503 | 149 | Na | 5.031781  | -1.55513  | 2.78784   |
| 72 | C | 10.363365 | 1.087949  | 2.129265 | 150 | Na | 5.230345  | 0.191471  | 0.039751  |
| 73 | C | 9.149068  | 1.746518  | 1.665762 | 151 | Na | 4.693726  | 3.470608  | -2.416547 |
| 74 | C | 7.997631  | 0.970253  | 1.405372 | 152 | Na | 2.280496  | 4.489289  | -0.29536  |
| 75 | N | 6.884354  | 1.4994    | 0.886818 | 153 | Na | -3.006101 | 4.067596  | -0.599487 |
| 76 | N | 9.12391   | 3.080391  | 1.436979 | 154 | Na | -1.102501 | 6.019362  | 1.350121  |
| 77 | C | 6.86952   | 2.814716  | 0.583767 | 155 | Na | -6.471345 | 1.865771  | -1.389184 |
| 78 | C | 8.032509  | 3.61194   | 0.917927 | 156 | Na | -5.068392 | -0.313051 | 0.533661  |

---

**Supplementary Table 3. The Na-155 bond and Na-156 bond level analysis in two different coordination environments of TQBQ-COF.**

| <b>Bond Order</b> | <b>Na-155</b> | <b>Na-156</b> |
|-------------------|---------------|---------------|
| O-29              | 0.00          | 0.29          |
| O-123             | 0.35          | 0.14          |
| N-30              | 0.00          | 0.27          |
| N-56              | 0.22          | 0.15          |
| ...               | ...           | ...           |
| Total             | 0.79          | 0.87          |

**Supplementary Table 4. The Gibbs free energy values and calculated stepwise voltages versus Na<sup>+</sup>/Na during sodiation.**

| Molecule                  | Single point<br>energy/hartree | Frequency<br>Correction/hartree | Gibbs Free<br>Energy/hartree | Stepwise<br>Voltage/V | Average<br>Voltage/V |
|---------------------------|--------------------------------|---------------------------------|------------------------------|-----------------------|----------------------|
| TQBQ-COF                  | -6,082.159613                  | 0.738773                        | -6,081.42084                 |                       |                      |
| Na                        | -162.2806672                   | -0.015083                       | -162.2957502                 |                       |                      |
| NaTQBQ-COF                | -6,244.564158                  | 0.734607                        | -6,243.829551                | 3.073821              |                      |
|                           |                                |                                 |                              | 268                   |                      |
| Na <sub>5</sub> TQBQ-COF  | -6,894.183812                  | 0.735137                        | -6,893.448675                | 2.966878              |                      |
|                           |                                |                                 |                              | 707                   |                      |
| Na <sub>6</sub> TQBQ-COF  | -7,056.542842                  | 0.732444                        | -7,055.810398                | 1.795204              | 2.78942338           |
|                           |                                |                                 |                              | 236                   |                      |
| Na <sub>7</sub> TQBQ-COF  | -7,218.937479                  | 0.735178                        | -7,218.202301                | 2.616460              |                      |
|                           |                                |                                 |                              | 556                   |                      |
| Na <sub>11</sub> TQBQ-COF | -7,868.317285                  | 0.730111                        | -7,867.587174                | 1.373304              |                      |
|                           |                                |                                 |                              | 579                   |                      |
| Na <sub>12</sub> TQBQ-COF | -8,030.665117                  | 0.729551                        | -8,029.935566                | 1.432459              | 1.59035646           |
|                           |                                |                                 |                              | 942                   |                      |

**Supplementary Table 5. Electrochemical performance comparison of the current reported organic cathodes of sodium batteries.**

| <b>Active material</b> | <b>Discharge voltage (V vs. Na<sup>+</sup>/Na)</b> | <b>Reversible capacity (mAh g<sup>-1</sup>) and rate capability</b> | <b>Capacity retention [%] (Cycle number /Current density)</b> | <b>Ref.</b>      |
|------------------------|----------------------------------------------------|---------------------------------------------------------------------|---------------------------------------------------------------|------------------|
| <b>DSR</b>             | 2.0                                                | 0.05 A g <sup>-1</sup> , 484;<br>1.0 A g <sup>-1</sup> , 371        | 90.6%<br>(50/0.05 A g <sup>-1</sup> )                         | <b>1</b>         |
| <b>C4Q</b>             | 2.2                                                | 0.045 A g <sup>-1</sup> , 343;<br>0.22 A g <sup>-1</sup> , 230      | 78%<br>(900/0.22 A g <sup>-1</sup> )                          | <b>2</b>         |
| <b>PAQS</b>            | 1.8                                                | 0.02 A g <sup>-1</sup> , 233;<br>6.4 A g <sup>-1</sup> , 165        | 85%<br>(500/1.6 A g <sup>-1</sup> )                           | <b>3</b>         |
| <b>PBQS</b>            | 2.08                                               | 0.05 A g <sup>-1</sup> , 268;<br>0.2 A g <sup>-1</sup> , 215        | 86%<br>(100/0.05 A g <sup>-1</sup> )                          | <b>4</b>         |
| <b>PIAN</b>            | ~2.0                                               | 0.05 A g <sup>-1</sup> , 190;<br>1.0 A g <sup>-1</sup> , 80         | 86.3%<br>(150/0.05 A g <sup>-1</sup> )                        | <b>5</b>         |
| <b>PPTS</b>            | 1.9                                                | 0.1 A g <sup>-1</sup> , 340;<br>10 A g <sup>-1</sup> , 155          | 86%<br>(1,000/1.0 A g <sup>-1</sup> )                         | <b>6</b>         |
| <b>CPF</b>             | 1.7                                                | 0.1 A g <sup>-1</sup> , 240,<br>1.0 A g <sup>-1</sup> , 168         | 82%<br>(1,000/1.0 A g <sup>-1</sup> )                         | <b>7</b>         |
| <b>BPOE</b>            | 2.5                                                | 0.01 A g <sup>-1</sup> , 230;<br>5.0 A g <sup>-1</sup> , 40         | 80%<br>(40/0.1 A g <sup>-1</sup> )                            | <b>8</b>         |
| <b>TQBQ-COF</b>        | ~2.0                                               | 0.02 A g <sup>-1</sup> , 452.0;<br>10 A g <sup>-1</sup> , 134.3     | 96%<br>(1,000/1.0 A g <sup>-1</sup> )                         | <b>This work</b> |

**Supplementary Table 6. The mass of sodium metal, electrolyte, and TQBQ-COF (active material) in the pouch-type sodium batteries.**

| Pouch-cell  | Mass                              |
|-------------|-----------------------------------|
| Na metal    | 0.25 g                            |
| Electrolyte | 4.0 g Ah <sup>-1</sup>            |
| TQBQ-COF    | 0.32 g (6.6 mg cm <sup>-2</sup> ) |

## Supplementary Methods

### Materials

Tetraminophenone (TABQ) was synthesized according to a previous reported literatures<sup>9</sup>. Cyclohexanehexaone (CHHO, ~99.0%) was bought from Sigma-Aldrich. All chromatographically pure solvents were directly used into the reactions without further purification.

### Electrical/Ionic conductivity measurements

The electrical conductivity of TQBQ-COF was achieved by measuring the pressed pellet of TQBQ-COF powder. To ensure well electrical contact between the TQBQ-COF pellet and the testing chips of the CHI660E Electrochemical Workstation, two stainless steel gaskets were used to sandwich the TQBQ-COF pellet tightly. The resistivity can be obtained by the linear sweep voltammetry (LSV) measurement, as the transient current through the pellet was measured as a function of voltage. The slope of the LSV curve for TQBQ-COF pellet was calculated to be about  $3.8208 \times 10^6 \text{ V A}^{-1}$ . The electrical conductivity of the TQBQ-COF pellet was calculated using the following formula:

$$\rho = (V/I) \times (S/L)$$
$$\sigma = 1/\rho \tag{1}$$

where  $V$  is the value of the applied voltage,  $I$  is the value of the corresponding current density,  $S$  is the area of the TQBQ-COF pellet,  $L$  is the thickness of the TQBQ-COF pellet,  $\rho$  is the resistivity of the TQBQ-COF pellet,  $\sigma$  is the electrical conductivity of the TQBQ-COF pellet. As  $L = 0.10 \text{ mm}$ , and  $S = 3.14 \times (0.013/2)^2 = 1.3267 \text{ m}^2$ , so  $\sigma = 1.973 \times 10^{-9} \text{ S cm}^{-1}$ .

The ionic conductivity of the pristine TQBQ-COF/Super P (8:1) was carried out on the CHI660E Electrochemical Workstation like the above electrical conductivity<sup>10</sup>. The discharged product was the pellet made in the argon-filled glovebox, with the thickness ( $L$ ) and surface area ( $S$ ) of 0.035 cm and 2.002 cm<sup>2</sup>, respectively. As the  $R_e = 3.06 \Omega$ , and the value of  $\frac{R_i \times R_e}{R_i + R_e}$  was 2.79  $\Omega$ , the  $R_i$  was calculated to be 31.62  $\Omega$ . Therefore, from the equation of

$$\sigma_i = \frac{L}{R_i \times S} \quad (2)$$

$\sigma_i$  was as high as  $5.53 \times 10^{-4} \text{ S cm}^{-1}$ .

### Reaction kinetics of the TQBQ-COF electrodes

To elucidate the reaction kinetics of the TQBQ-COF electrodes, the Na<sup>+</sup> diffusion coefficient ( $D_{Na^+}$ ) was calculated by the equation<sup>11</sup>:

$$I_p = 2.69 \times 10^5 n^{3/2} S D^{1/2} \nu^{1/2} C \quad (3)$$

where  $I_p$  is the peak current;  $n$ ,  $S$ ,  $\nu$  and  $C$  are the electron transference number, the surface area of the electrode, the scan rate, and the concentration of Na<sup>+</sup> in the materials, respectively;  $D$  is the diffusion coefficient of Na<sup>+</sup>. The  $D_{Na^+}$  of the TQBQ-COF electrode was calculated to be  $\sim 10^{-11} \text{ cm}^2 \text{ s}^{-1}$ . Moreover, the good reaction kinetics of TQBQ-COF electrode can also be verified by the galvanostatic intermittent titration technique (GITT) measurement. The  $D_{Na^+}$  of TQBQ-COF electrode was close to  $10^{-11} \text{ cm}^2 \text{ s}^{-1}$ . The  $D_{Na^+}$  calculated by the GITT method was based on the following equation<sup>12</sup>:

$$D = \frac{4}{\pi \tau} \left( \frac{V_m n_m}{S} \right)^2 \left( \frac{\Delta E_s}{\Delta E_t} \right)^2 \quad (4)$$

where  $\tau$  is the pulse time,  $n_m$  is the mole number,  $V_m$  is the molar volume,  $S$  is the electrode-electrolyte interface area,  $\Delta E_s$  is the voltage difference between the steady state and the initial state of every step, and  $\Delta E_t$  is the change of total voltage during a pulse step excluding the IR drop. The molar volume ( $383.7 \text{ cm}^3 \text{ mol}^{-1}$ ) of per TQBQ-COF repetitive unit was calculated by measuring the mass and the total volume of a pressed TQBQ-COF pellet (Supplementary Fig. 26), and the value was acceptable here when compared with some reported organic electrode materials<sup>13</sup>.



### Pouch-type sodium batteries assembly

The pouch-type cell with a capacity of 81 mAh was constructed with TQBQ-COF cathode, excess Na anode and 1.0 M NaPF<sub>6</sub>/DEGDME. 0.64 g TQBQ-COF powder, Super P and PVDF (5:4:1 by weight) were mixed by hand grinding. After the addition of NMP solution, the resulting slurry was casted onto the Al foil with the active material loading of 6.6 mg cm<sup>-2</sup>. The resulted electrodes are dried at 80 °C for 12 hours under vacuum. To assembly the pouch-cell, Celgard 2400 membrane was used as the separator to lower the whole cell mass, and 1.0 M NaPF<sub>6</sub>/DEGDME solution was applied as the electrolyte. In addition, the two polytetrafluoroethylene (PTFE) plates (8×10 cm<sup>2</sup>) were used to keep the flatness of the electrodes. The mass energy density ( $w$ , Wh kg<sup>-1</sup>) was calculated based on the following equation:

$$w = C \times E / m \quad (5)$$

where  $C$  (Ah) is the battery discharge capacity,  $E$  (V) is the average discharge platform,  $m$  (kg) is a mass of the total pouch sodium battery. As the mass of the full pouch sodium battery ( $m$ ) was 1.49 g (except the mass of the two PTFE plates, which were outside the electrodes), the discharge capacity was 81 mAh, and the average discharge platform ( $E$ ) for the pouch cell was 1.86 V, so the energy density ( $w$ ) was 101.1 Wh kg<sup>-1</sup>, and the capacity normalized based on the whole mass of the pouch-cell was 54.4 mAh g<sup>-1</sup>. In addition, the volumetric energy ( $w'$ , Wh L<sup>-1</sup>) of the total pouch-cell was calculated to be 78.5 Wh L<sup>-1</sup>, according to the equation of

$$w' = C \times E / V \quad (6)$$

where the volume of the pouch-cell ( $V$ ) was 1.92 (6×8×0.04) cm<sup>3</sup>.

## Supplementary References

1. Lee, M. et al. High-performance sodium-organic battery by realizing four-sodium storage in disodium rhodizonate. *Nat. Energy* **2**, 861-868 (2017).
2. Wang, X. C. et al. Combining quinone cathode and ionic liquid electrolyte for organic sodium-ion batteries. *Chem* **5**, 21 (2018).
3. Deng, W. W. et al. A low cost, all-organic Na-ion battery based on polymeric cathode and anode. *Sci. Rep.* **3**, 2671 (2013).
4. Song, Z. P. et al. Poly(benzoquinonyl sulfide) as a high-energy organic cathode for rechargeable Li and Na batteries. *Adv. Sci.* **2**, 1500124 (2015).
5. Dong, L. et al. Environmentally-friendly aqueous Li (or Na)-ion battery with fast electrode kinetics and super-long life. *Sci. Adv.* **2**, 1501038 (2016).
6. Tang, M. et al. Tailoring  $\pi$ -conjugated systems: from  $\pi$ - $\pi$  stacking to high-rate-performance organic cathodes. *Chem* **4**, 2600-2614 (2018).
7. Li, H. Y. et al. Large  $\pi$ -conjugated porous frameworks as cathodes for sodium-ion batteries. *J. Phys. Chem. Lett.* **9**, 3205-3211 (2018).
8. Sakaushi, K. et al. Aromatic porous-honeycomb electrodes for a sodium-organic energy storage device. *Nat. Commun.* **4**, 1485 (2013).
9. Manivannan, R., Ciattini, S., Chelazzi, L. & Elango, K. P. Benzoquinone-imidazole hybrids as selective colorimetric sensors for cyanide in aqueous, solid and gas phases. *RSC Adv.* **5**, 87341-87351 (2015).
10. Wang, C. S. & Hong, J. Ionic/Electronic conducting characteristics of LiFePO<sub>4</sub> cathode materials. *Electrochem. Solid-State Lett.* **10**, A65-A69 (2007).
11. Levi, M. D. & Aurbach, D. The mechanism of lithium intercalation in graphite film electrodes in aprotic media. Part 1. High resolution slow scan rate cyclic voltammetric studies and modeling. *J. Electroanal. Chem.* **421**, 79-88 (1997).
12. Liang, Y. L., Tao, Z. L. & Chen, J. Organic electrode materials for rechargeable lithium batteries. *Adv. Energy Mater.* **2**, 742-769 (2012).
13. Schon, T. B., Mcallister, B. T., Li, P. F. & Seferos, D. S. The rise of organic electrode materials for energy storage. *Chem. Soc. Rev.* **45**, 6345-6404 (2016).
